# Supplementary material for: A High-Pressure, High-Temperature Flow Reactor Simulating the Hadean Earth Environment, with Application to the Pressure Dependence of the Cleavage of Avocado Viroid Hammerhead Ribozyme
Source: MDPI journal article supplement (doi:10.3390/life12081224), 2022-08-12
Supplement: s1 [file s1]

## Supplementary data

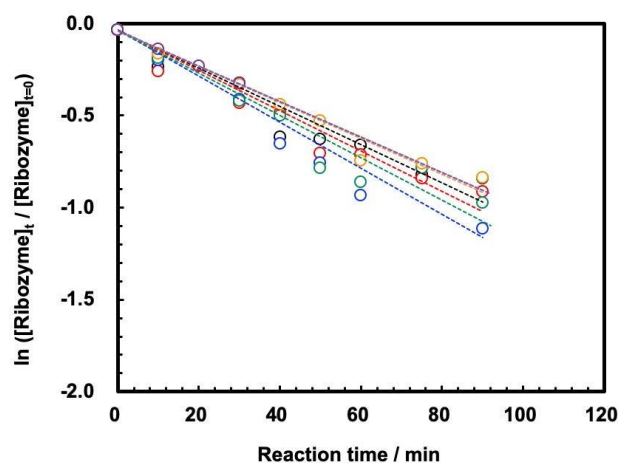

Figure S1. First-order rate plots for the cleavage of ASBVd(-):HHR at 0.1 MPa. [ASBVd(-):HHR] = 0.132  $\mu\text{g}$  / 50  $\mu\text{L}$  solution. [HEPES] = 0.05 M, [MgCl<sub>2</sub>] = 0.05 M, pH = 8.0. Black circles: 45 °C, red circles: 50 °C, blue circles: 55 °C, green circles: 60 °C, orange circles: 65 °C, purple circles: 70 °C.

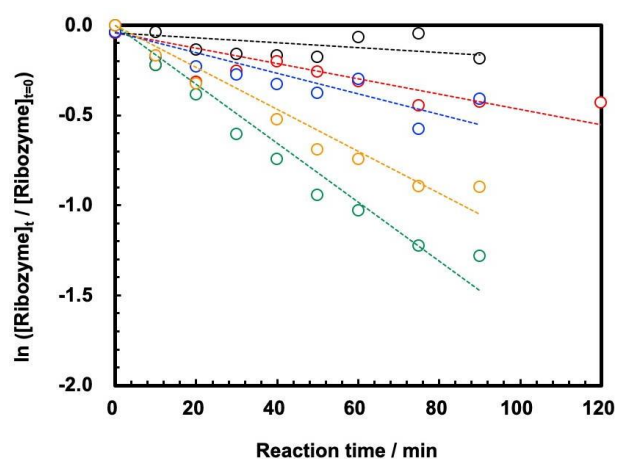

Figure S2. First-order rate plots for the cleavage of ASBVd(-):HHR at 30.0 MPa. [ASBVd(-):HHR] = 3.30  $\mu\text{g}$  / 110  $\mu\text{L}$  solution. [HEPES] = 0.05 M, [MgCl<sub>2</sub>] = 0.05 M, pH = 8.0. Black circles: 45 °C, red circles: 50 °C, blue circles: 55 °C, green circles: 60 °C, orange circles: 65 °C.
